# Supplementary material for: Auraptene Enhances Junction Assembly in Cerebrovascular Endothelial Cells by Promoting Resilience to Mitochondrial Stress through Activation of Antioxidant Enzymes and mtUPR
Source: MDPI journal article supplement (doi:10.3390/antiox10030475), 2021-03-17
Supplement: s1 [file s1]

# Auraptene Enhances Junction Assembly in Cerebrovascular Endothelial Cells by Promoting Resilience to Mitochondrial Stress through Activation of Antioxidant Enzymes and mtUPR

Min Joung Lee <sup>1,2,3</sup>, Yunseon Jang <sup>1,2,3</sup>, Jiebo Zhu <sup>1,2,3</sup>, Eunji Namgung <sup>1,2,3</sup>, Dahyun Go <sup>1,2,3</sup>, Changjun Seo <sup>1,2,3</sup>, Xianshu Ju <sup>1,3</sup>, Jianchen Cui <sup>1,3</sup>, Yu Lim Lee <sup>1,3</sup>, Hyeon Kang <sup>1,2</sup>, Hyeonseok Kim <sup>1,2</sup>, Woosuk Chung <sup>1,4,5,\*</sup> and Jun Young Heo <sup>1,2,3,\*#</sup>

<sup>1</sup> Department of Medical Science, Chungnam National University School of Medicine, Daejeon 35015, Korea; rmj1102@cnu.ac.kr (M.J.L.); yunseonj@cnu.ac.kr (Y.J.); zhujiebo2019@o.cnu.ac.kr (J.Z.);

eunzie13@o.cnu.ac.kr (E.N.); goda1046@o.cnu.ac.kr (D.G.); justin20@o.cnu.ac.kr (C.S.); hyoeunKang@o.cnu.ac.kr (H.K.); juxianshu1214@o.cnu.ac.kr (X.J.); 201860391@o.cnu.ac.kr (J.C.); leestar95@o.cnu.ac.kr (Y.L.L.); hskim85@cnu.ac.kr (H.K.)

<sup>2</sup> Department of Biochemistry, Chungnam National University School of Medicine, Daejeon 35015, Korea

<sup>3</sup> Infection Control Convergence Research Center, Chungnam National University School of Medicine, Daejeon 35015, Korea

<sup>4</sup> Department of Anesthesiology and Pain Medicine, Chungnam National University School of Medicine, Daejeon 35015, Korea

<sup>5</sup> Department of Anesthesiology and Pain Medicine, Chungnam National University Hospital, Daejeon 35015, Korea

\* Correspondence: woosuk119@cnu.ac.kr (W.C.); jyheo@cnu.ac.kr (J.Y.H.); Tel.: +82-042-580-8222 (J.Y.H.)

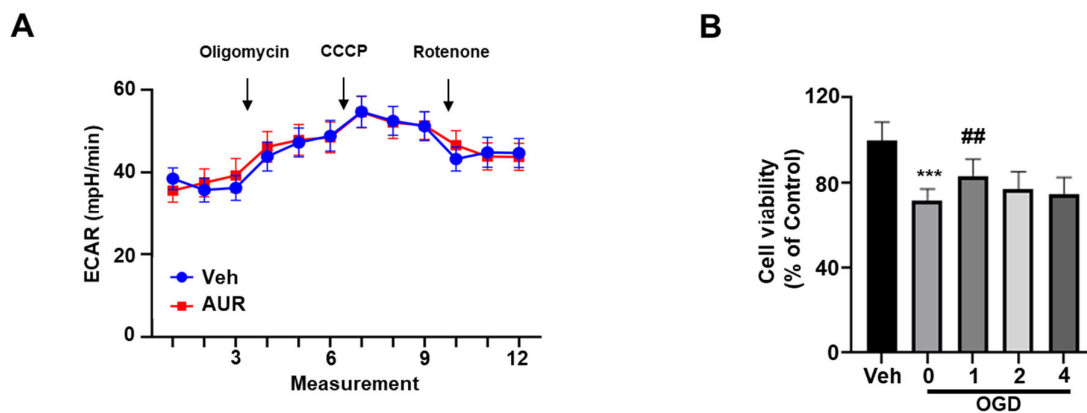

Supplementary Figure 1.

(A) extracellular acidification rate (ECAR) was measured in bEnd.3 cells treated with vehicle or 1  $\mu$ M AUR for 24h.

(B) bEnd.3 cells ( $5 \times 10^3$  cells per well) seeded in 96-well plates were incubated in OGD condition for 3h after incubated in media containing 0, 1, 2, 4  $\mu$ M of AUR for 18h. Vehicle group was

incubated in normal condition for 24h. Cell viability was measured by SRB assay ( $*** p < 0.001$  compared to Veh,  $\# p < 0.05$  compared to OGD).

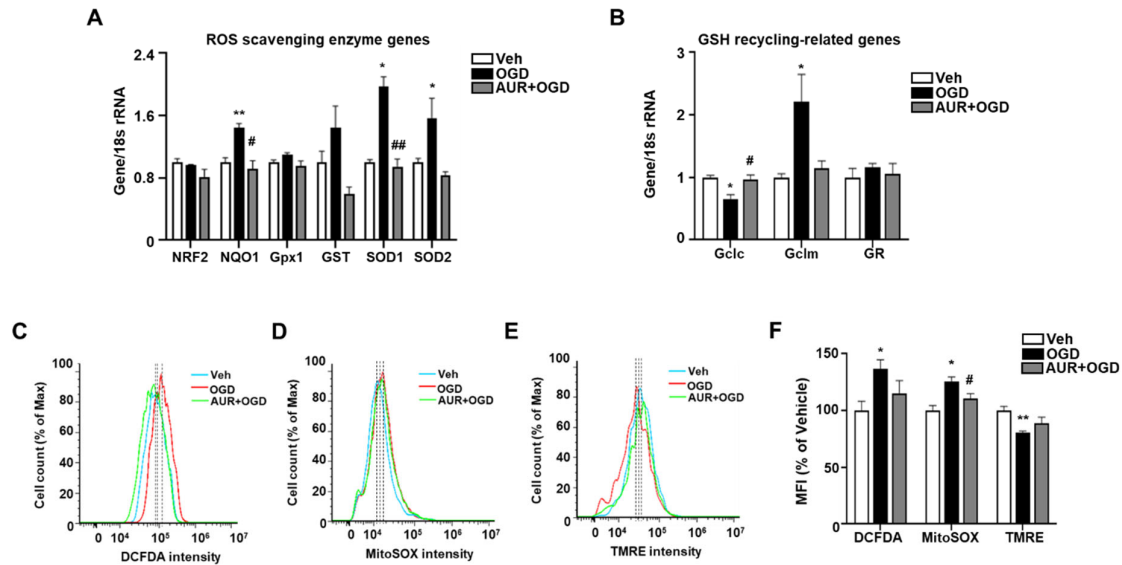

## Supplementary Figure 2.

(A, B) mRNA expressions for ROS scavenging antioxidant enzymes and GSH recycling-related genes were analyzed using qPCR with bEnd.3 cells incubated in OGD 3h after treatment of vehicle or 1  $\mu$ M AUR.

(C, D) bEnd.3 cells were incubated in OGD 3h after treatment of vehicle or 1  $\mu$ M AUR. The cells were stained with 5  $\mu$ M CM-H<sub>2</sub>DCFDA or 5  $\mu$ M MitoSOX<sup>TM</sup> or 100 nM TMRE and analyzed by flow cytometry. Total ROS was determined by DCFDA-stained cells(C), mitochondrial ROS was determined by MitoSOX<sup>TM</sup> – stained cells (D) and mitochondrial membrane potential was determined by TMRE-stained cells (E). (F) Median fluorescence intensity (MFI) values are analyzed by FlowJo program. Data are presented as mean and  $\pm$  SEM of three independent experiments (\*  $p < 0.05$ , \*\*  $p < 0.01$  compared to Veh, #  $p < 0.05$  compared to OGD).
